# Supplementary material for: Exploring candidate biological functions by Boolean Function Networks for Saccharomyces cerevisiae
Source: PLoS One. 2017 Oct 5;12(10):e0185475. doi: 10.1371/journal.pone.0185475 (PMC5628832; doi:10.1371/journal.pone.0185475)
Supplement: S4 Table — (XLSX) [file pone.0185475.s004.xlsx]

## Sheet: Sheet1
Source	Source phase	Target	Target phase	Source no	Target no	Function	Time delay	p-value
YCL055W	M/G1	YLR286C	G1	4	49	1	1	0.00454249
YER111C	M/G1	YKL101W	G1	6	46	1	1	0.00470274
YER111C	M/G1	YOL090W	G1	6	58	1	1	0.00441932
YKL185W	M/G1	YLR286C	G1	8	49	1	2	0.0046676
YNL327W	M/G1	YLR286C	G1	13	49	1	2	0.00435625
YBR088C	G1	YKL101W	G1	18	46	1	1	0.00437734
YDL003W	G1	YKL101W	G1	20	46	1	1	0.00378741
YDL164C	G1	YKL101W	G1	24	46	1	1	0.00436389
YER095W	G1	YKL101W	G1	34	46	1	1	0.00404771
YGR109C	G1	YAR007C	G1	37	15	1	1	0.00497359
YGR109C	G1	YBR088C	G1	37	18	1	1	0.00426893
YGR109C	G1	YDL164C	G1	37	24	1	1	0.00369671
YGR109C	G1	YKL101W	G1	37	46	1	1	0.00357081
YGR109C	G1	YMR199W	G1	37	51	1	1	0.00434987
YGR109C	G1	YNL262W	G1	37	55	1	1	0.00366962
YGR109C	G1	YNL312W	G1	37	57	1	1	0.00347658
YGR109C	G1	YOL090W	G1	37	58	1	1	0.00399267
YGR109C	G1	YPL256C	G1	37	62	1	1	0.00468767
YGR109C	G1	YPR175W	G1	37	65	1	1	0.00306605
YIL066C	G1	YKL101W	G1	38	46	1	1	0.00390404
YJL115W	G1	YDL164C	G1	40	24	1	1	0.00388402
YJL115W	G1	YNL262W	G1	40	55	1	1	0.00471047
YJL115W	G1	YOR074C	G1	40	59	1	1	0.00481655
YJL115W	G1	YPR175W	G1	40	65	1	1	0.00459415
YKL113C	G1	YKL101W	G1	47	46	1	1	0.00352309
YLR103C	G1	YKL101W	G1	48	46	1	1	0.00325409
YNL082W	G1	YKL101W	G1	53	46	1	1	0.00371124
YNL082W	G1	YPR175W	G1	53	65	1	1	0.00493981
YPL153C	G1	YKL101W	G1	61	46	1	1	0.00436609
YPL153C	G1	YOL090W	G1	61	58	1	1	0.00485881
YPL256C	G1	YKL101W	G1	62	46	1	1	0.00400978
YER001W	G1	YBR010W	S	32	69	1	1	0.00435029
YER001W	G1	YDR224C	S	32	70	1	1	0.00428064
YER001W	G1	YNL030W	S	32	74	1	1	0.00428871
YER001W	G1	YNL031C	S	32	75	1	1	0.0047383
YKL101W	G1	YBR009C	S	46	68	1	1	0.00448872
YKL101W	G1	YBR010W	S	46	69	1	1	0.00471708
YKL101W	G1	YDR224C	S	46	70	1	1	0.00482708
YKL101W	G1	YNL030W	S	46	74	1	1	0.00443446
YKL101W	G1	YMR198W	S/G2	46	84	1	2	0.00448456
YNL030W	S	YBL003C	S	74	67	1	1	0.00476934
YBL002W	S	YIL106W	G2/M	66	97	1	2	0.00405716
YBL002W	S	YMR001C	G2/M	66	100	1	2	0.00430733
YBL003C	S	YIL106W	G2/M	67	97	1	2	0.00443085
YBL003C	S	YMR001C	G2/M	67	100	1	2	0.0044664
YBR009C	S	YIL106W	G2/M	68	97	1	2	0.00496735
YBR009C	S	YMR001C	G2/M	68	100	1	2	0.00441869
YBR010W	S	YMR001C	G2/M	69	100	1	2	0.0047743
YDR224C	S	YMR001C	G2/M	70	100	1	2	0.00441048
YDR225W	S	YIL106W	G2/M	71	97	1	2	0.00394044
YDR225W	S	YMR001C	G2/M	71	100	1	2	0.00382652
YNL030W	S	YMR001C	G2/M	74	100	1	2	0.00451536
YDR150W	S/G2	YGL116W	G2/M	78	93	1	1	0.00440318
YDR146C	G2/M	YHR152W	G2/M	91	96	1	1	0.00361267
YGR108W	G2/M	YGL116W	G2/M	95	93	1	1	0.00499201
YGR108W	G2/M	YHR152W	G2/M	95	96	1	1	0.0049182
YMR001C	G2/M	YBR054W	G2/M	100	87	1	1	0.00491498
YMR001C	G2/M	YDR033W	G2/M	100	89	1	2	0.00493554
YMR001C	G2/M	YGL116W	G2/M	100	93	1	1	0.00357917
YMR001C	G2/M	YHR152W	G2/M	100	96	1	1	0.00493599
YAL040C	G2/M	YLR274W	M/G1	85	10	1	1	0.00441405
YBR054W	G2/M	YKL185W	M/G1	87	8	1	1	0.00470546
YBR054W	G2/M	YNL327W	M/G1	87	13	1	2	0.00495832
YGR092W	G2/M	YLR274W	M/G1	94	10	1	1	0.00483812
YBR054W	G2/M	YLR286C	G1	87	49	1	4	0.00417663
YDR033W	G2/M	YLR286C	G1	89	49	1	4	0.00387607
YNL145W	G2/M	YAR007C	G1	101	15	1	2	0.00462645
YNL145W	G2/M	YPL153C	G1	101	61	1	2	0.00487366
